# Annals of Oncology

Official Journal of the  
European Society for Medical Oncology

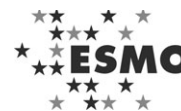

---

## Volume 17, 2006 Supplement 1

European Multidisciplinary Colorectal Cancer Congress

*12–14 February, 2006: Berlin, Germany*

## Table of Contents

|                            |     |
|----------------------------|-----|
| Introduction               | i5  |
| Committees                 | i6  |
| Scientific Programme       | i7  |
| Oral Presentation Schedule | i8  |
| <b>Abstracts</b>           |     |
| Orals                      | i11 |
| Posters                    | i16 |
| Publications               | i38 |
| Author index               | i39 |
